# Supplementary material for: Characterization of Increased Extracellular Vesicle-Mediated Tigecycline Resistance in Acinetobacter baumannii
Source: MDPI journal article supplement (doi:10.3390/pharmaceutics15041251), 2023-04-15
Supplement: s1 [file s1]

# **Supplementary Materials: Characterization of increased extracellular vesicle-mediated tigecycline resistance in *Acinetobacter baumannii***

**Hyejin Cho, Tesalonika Sondak, and Kwang-sun Kim\***

Department of Chemistry and Chemistry Institute of Functional Materials, Pusan National University, Busan, 46241, South Korea

\*Correspondence: [kwangsun.kim@pusan.ac.kr](mailto:kwangsun.kim@pusan.ac.kr); Tel.: +82-51-510-2241

(a) TIG-R18

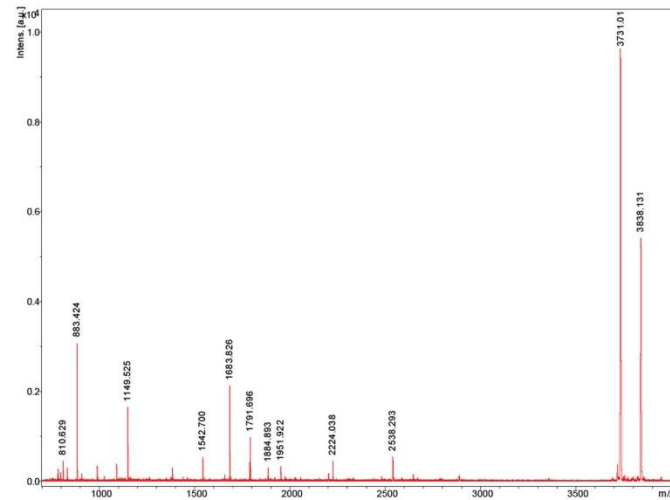

1 MKNIQKSLLA ALIVAGYAVN TQAAVTGQVD VKLNISTGCT VGGSQTEGNM 50  
51 NKFGTLNFGK TSGTWNNVLT AEVASAATGG NISVTCDGTD PVDFTVAIDG 100  
101 GERTDRTLKN TASADVAYN VYRDAARTNL YVYNQPOQFT TVSGQATAVP 150  
151 IFGAIAPNTG TPKAQGDYKD TLLVTVNE 178

(b) TIG-R23

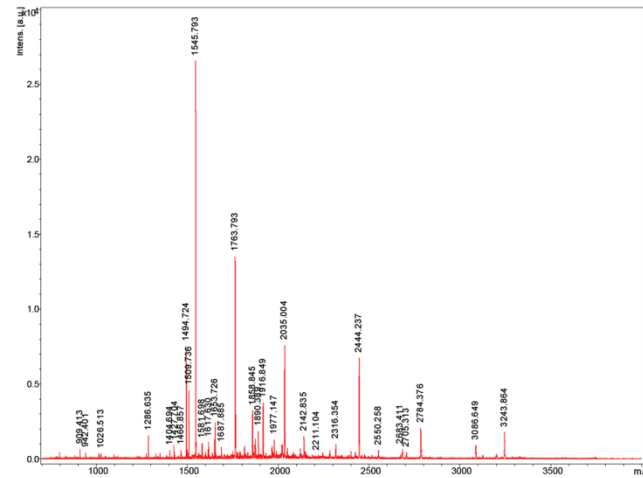

1 MKKLAIASAL LSALAVSGAA NAYQAEVGGG YNYLDPDNGS SVSKFGVDGT 50  
51 YYFNPVQTRN APLAEEAFLN RASNVNAHVN YGDNSGTKDT QYGVGVEYFV 100  
101 PNSDFYLSGD VGRNEREIDN TNIDSKVTTY AAEVGYLPAP GLLLALGVKG 150  
151 YDEKDGKDGA DPTVRAKYVT QVGQHDVNLE AYGAFGDLDE YKVRGDYYID 200  
201 KTLSLGVDDY NNDLTDKDEF GINAKKFLNQ QVSVEGRVGF GDNDNTYGVR 250  
251 AAYRF 255

(c) TIG-R25

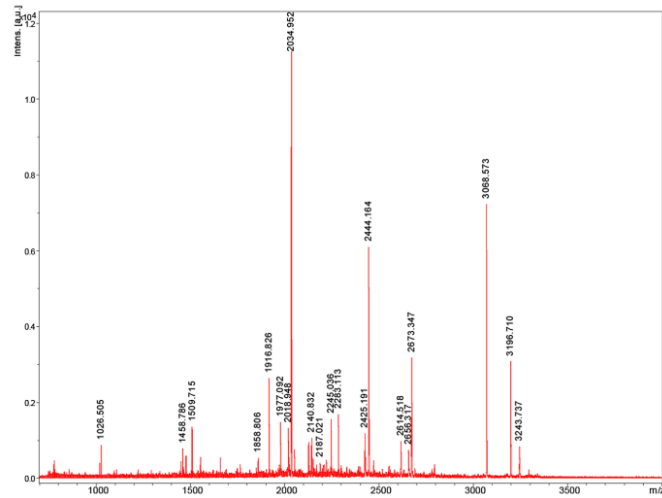

```
1   MKVLRVLVTT  TALLAAGAAM  ADEAVVHDSY  AFDKNQLIPV  GARAEVGTTG   50
51  YGGALLWQAN  PYVGLALGYN  GGDISWTDDV  SVNGTKYDLD  MDNNNVYLNA  100
101 EIRPWGASTN  PWAQGLYIAA  GAAYLDNDYD  LAKRIGNGDT  LSIDGKNYQQ  150
151 AVPGQEGGVR GKMSYKNDIA PYLGFGFAPK ISKNWGVFGE VGAYYTGNPK  200
201 VELTQYNLAP VTGNPTSQD AVDKEANEIR  NDNKYEWMPV  GKVGVNIFYW  249
```

(d) TIG-R30

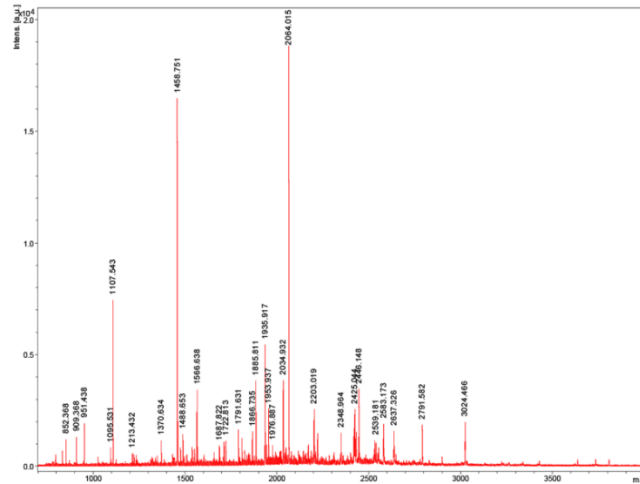

```
1   MRFSQLKVG  V  IAALLSVSSF  AAQEFNLVSY  DPTRELYTDF  NKQFGTYWKO   50
51  RTGQDIEFKQ SHGGSGKQAR AVIDGLNADV VTLALAADID EIAEKAKLLP  100
101 TDWQKKLPQN  STPYTSTIVE LVRKGNPKQI  KDWGDLIKPG  VEIITPNPKT  150
151 SGGARWNYLA  AWAWAKHQAG  GNDAKAQEFV  RQIYKHTKVL  DSGARGATTT  200
201 FAERGIGDVL  LAWENEAHLA IREQPGKFEI VTPSLSILAE PPVAIVEKNA  250
251 AKKGNLTIAK  GYLNLYLSPA  GQEIAARNFY  RPRNAAVLKK  YSNVFKPLKL  300
301 VTIDKEFGGW  TKVQKQHFDN  GGVFDQIVKI  NSAEK                               335
```

(e) TIG-R37

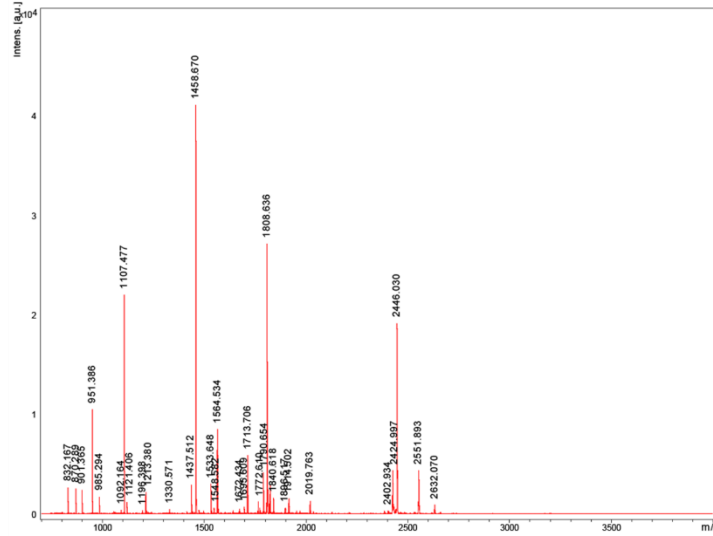

1 MKLSRIALAT MLVAAPLAAA NAGVTVTPLL LGYTFQDSQH NNGGKDGNLT 50  
51 NGPELQDDLF VGAALGIELT PWLGFEAEYN QVKGDVDGAS AGAEYKQKQI 100  
101 NGNFYVTS DL ITKNYDSK**IK PYVLLGAGHY KYDFDGVNRG** TRGTSEEGTL 150  
151 GNAGVGAFWR **LNDALSLR**TE ARATYNAD EE FWNYTALAGL NVVLGGHLKP 200  
201 AAPVVEVAPV EPTPVAPQPQ ELTEDLN MEL **RVFFDTNKS** **IKDQYKPEIA** 250  
251 **KVAEK****LSEYP** **NATARIEGHT** **DNTGPRKLNE** RL SLARANSV **K****SALVNEYNV** 300  
301 **DASR**LSTQGF AWDQPIADNK TKEGRAMNR**R** **VFATITGSRT** VVVQPGQEAA 350  
351 APAAAQ 356

**Figure S1. MALDI-TOF/MS spectrum and amino acid sequences of protein bands from TIG-R derived EVs.** Mass spectral data (top) and full amino acids to matched proteins (bottom) of (a) TIG-R 18, (b) TIG-R23, (c) TIG-R25, (d) TIG-R30, and (e) TIG-R37 are shown. Band IDs are adapted from **Figure 1**. All analysis of peptide fragments were as described in *Materials and Methods*. Bold underlined sequences below the mass spectrum indicate matched amino acids to the proteins adapted from UniProt database ([26]; [www.uniprot.org](http://www.uniprot.org); accessed on February 2023).

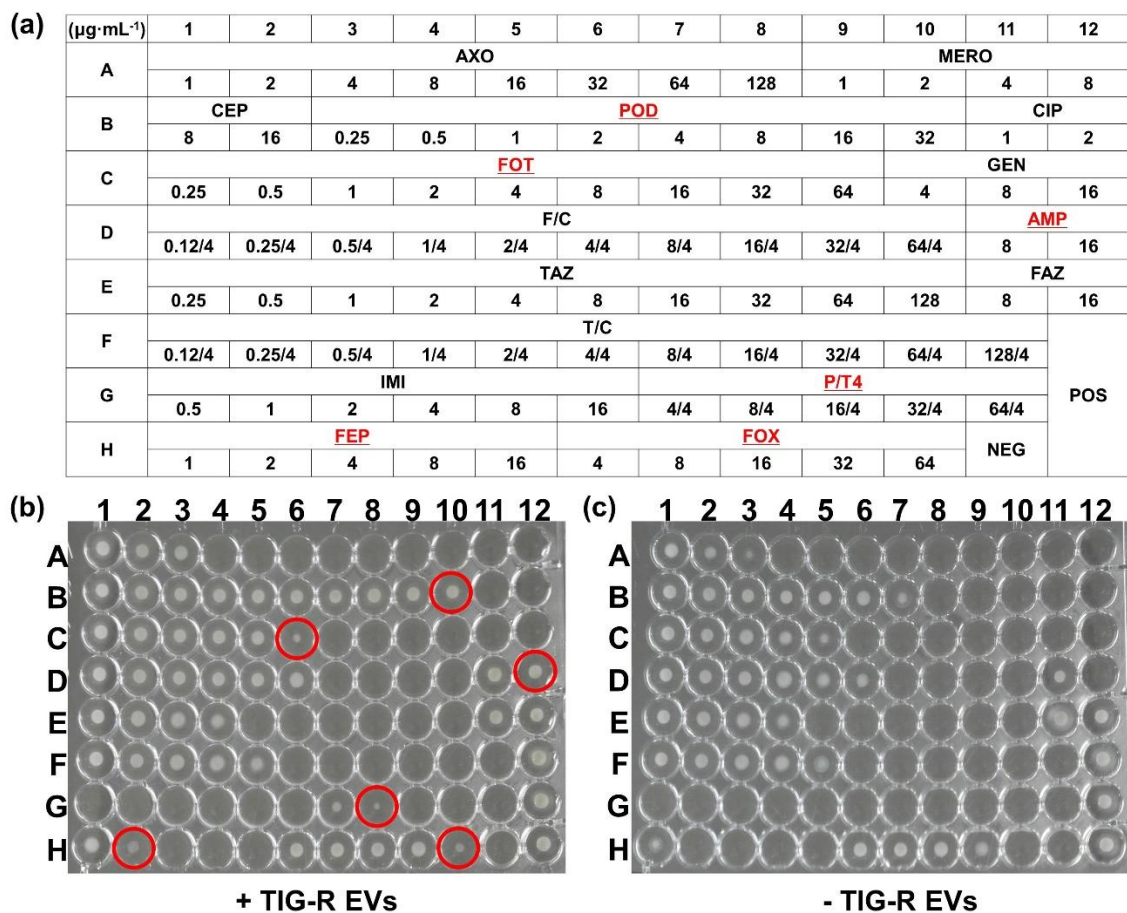

**Figure S2.** Confirmation of TIG-R EV-mediated resistance to other antibiotics. (a) Information on antibiotics and the working concentration. Sensititre™ Extended Spectrum Beta-lactamase Plate (Cat. No. ESB1F, Thermo Fisher Scientific, Waltham, MA, USA) with final concentration of individual antibiotics shown. TAZ, Ceftazidime; FAZ, Cefazolin; FEP, Cefepime; FOX, Cefoxitin; CEP, Cephalothin; POD, Cefpodoxime; FOT, Cefotaxime; AXO, Ceftriaxone; IMI, Imipenem; MERO, Meropenem; GEN, Gentamicin; AMP, Ampicillin; CIP, Ciprofloxacin; P/T4, Piperacillin/tazobactam constant 4; T/C, Ceftazidime/clavulanic acid; F/C, Cefotaxime/clavulanic acid; NEG and POS indicate the negative and positive control, respectively. (b, c) Effect of TIG-R EVs on the resistance to antibiotics. TIG-S cells were cultured in a Sensititre™ Extended Spectrum Beta-lactamase Plate with (b) or without (c) TIG-R EVs ( $5\mu\text{g}\cdot\text{mL}^{-1}$ ). Red circle of the plate indicated resistance for each antibiotic. One representative from  $n=3$  was shown. The 96-well plates were imaged with digital camera (Samsung NX200, Suwon, Korea).

**Table S1. Identification of proteins enriched or solely presented in TIG-R EVs**

| Band ID | Accession No. | Protein size<br>(amino acids) | Coverage to<br>proteins (%) | Function                                    |
|---------|---------------|-------------------------------|-----------------------------|---------------------------------------------|
| TIG-R37 | Q6RYW5        | 356                           | 26                          | Outer membrane protein                      |
|         |               |                               |                             | Sulfate ABC transporter                     |
| TIG-R30 | D0CBP2        | 335                           | 42                          | periplasmic substrate-<br>binding protein   |
| TIG-R25 | D0CBN6        | 249                           | 37                          | Carbapenem-associated<br>resistance protein |
| TIG-R23 | D0CF50        | 255                           | 54                          | General bacterial porin                     |
| TIG-R18 | A0A6F8TDQ5    | 178                           | 42                          | Spore Coat Protein U domain protein         |

Band ID indicates the protein bands shown in **Figure 1**. Based on the Mass spectral data from **Figure S1** and searches of MASCOT database and UniProt database ([26]; [www.uniprot.com](http://www.uniprot.com); accessed on February 13, 2023), proteins were identified as encoded from *Acinetobacter baumannii*. Coverage (%) was determined as the percentile of peptides overlapping to full-size proteins.

## Reference

26. The UniProt Consortium. UniProt: The Universal Protein Knowledgebase in 2023. *Nucleic Acids Res.* **2023**, *51*, D523–D531. <https://doi.org/10.1093/nar/gkac1052>.
